# Supplementary material for: Development of a Quantitative Method for Detection of Multiclass Veterinary Drugs in Feed Using Modified QuPPe Extraction and LC–MS/MS
Source: MDPI journal article supplement (doi:10.3390/molecules27144483), 2022-07-13
Supplement: s1 [file s1]

# Supplementary Materials: Development of a Quantitative Method for Detection of Multiclass Veterinary Drugs in Feed Using Modified QuPPE Extraction and LC-MS/MS

Sunyeong Jang <sup>1,†</sup>, Hyungju Seo <sup>1,†</sup>, Hoin Kim <sup>1</sup>, Hyoyoung Kim <sup>1</sup>, Jongsung Ahn <sup>2</sup>, Hyunjeong Cho <sup>1</sup>, Sunghie Hong <sup>1</sup>, Seunghwa Lee <sup>1,\*</sup> and Taewoong Na <sup>1,\*</sup>

**Table S1.** Validation data for determination of the matrix effect and the recovery of 30 veterinary drugs in corn, cow, and pet feeds ( $n = 5$ ).

| Analyte            | Matrix Effect (%) | Intra-Lab (n = 5) |       |          |       |          |       | Inter-Lab (n = 5) |       |          |       |          |       |
|--------------------|-------------------|-------------------|-------|----------|-------|----------|-------|-------------------|-------|----------|-------|----------|-------|
|                    |                   | Low               |       | Middle   |       | High     |       | Low               |       | Middle   |       | High     |       |
|                    |                   | Recovery          | RSD   | Recovery | RSD   | Recovery | RSD   | Recovery          | RSD   | Recovery | RSD   | Recovery | RSD   |
|                    |                   | (%)               | (%)   | (%)      | (%)   | (%)      | (%)   | (%)               | (%)   | (%)      | (%)   | (%)      | (%)   |
| Corn feed          |                   |                   |       |          |       |          |       |                   |       |          |       |          |       |
| Amphenicols (1)    |                   |                   |       |          |       |          |       |                   |       |          |       |          |       |
| Florfenicol amine  | 50.32             | 98.78             | 7.53  | 99.33    | 10.76 | 95.50    | 18.74 | 100.66            | 2.63  | 104.06   | 6.42  | 100.19   | 6.62  |
| Anthelmintics (1)  |                   |                   |       |          |       |          |       |                   |       |          |       |          |       |
| Diethylcarbamazine | 8.01              | 77.65             | 6.64  | 97.92    | 5.95  | 76.93    | 5.12  | 92.86             | 23.16 | 103.71   | 7.89  | 91.06    | 21.94 |
| Cephalosporins (4) |                   |                   |       |          |       |          |       |                   |       |          |       |          |       |
| Cefadroxil         | -91.68            | 94.49             | 15.24 | 83.24    | 6.42  | 95.37    | 9.22  | 92.29             | 3.37  | 85.31    | 3.42  | 90.46    | 7.68  |
| Cefalexin          | -93.35            | 90.53             | 14.46 | 103.51   | 5.84  | 108.98   | 6.45  | 90.63             | 0.16  | 94.20    | 13.98 | 98.39    | 15.22 |
| Cefalonium         | -95.22            | 112.02            | 11.37 | 74.07    | 3.67  | 87.98    | 9.46  | 93.58             | 22.88 | 75.54    | 2.75  | 82.52    | 9.36  |
| Cephapirin         | -39.38            | 92.52             | 13.95 | 79.94    | 8.29  | 97.69    | 8.29  | 82.73             | 16.74 | 75.22    | 8.88  | 83.93    | 23.20 |
| Coccidiostats (1)  |                   |                   |       |          |       |          |       |                   |       |          |       |          |       |
| Amprolium          | -82.63            | 73.06             | 9.67  | 94.90    | 13.37 | 102.26   | 9.98  | 92.06             | 27.19 | 101.35   | 9.00  | 104.51   | 3.04  |
| Lincosamides (1)   |                   |                   |       |          |       |          |       |                   |       |          |       |          |       |
| Lincomycin         | 40.07             | 87.75             | 6.92  | 85.32    | 11.35 | 71.62    | 1.95  | 99.42             | 16.60 | 96.20    | 15.99 | 87.17    | 25.22 |
| Macrolide (1)      |                   |                   |       |          |       |          |       |                   |       |          |       |          |       |
| Tulathromycin      | -21.43            | 105.42            | 10.35 | 114.25   | 8.26  | 101.83   | 1.80  | 104.30            | 1.53  | 113.33   | 1.15  | 105.62   | 5.07  |
| Nitroimidazole (1) |                   |                   |       |          |       |          |       |                   |       |          |       |          |       |

|                                         |        |        |       |        |       |        |       |        |       |        |       |        |       |
|-----------------------------------------|--------|--------|-------|--------|-------|--------|-------|--------|-------|--------|-------|--------|-------|
| Metronidazole-OH                        | -34.93 | 101.84 | 13.31 | 118.42 | 1.67  | 115.20 | 4.37  | 102.37 | 0.73  | 109.45 | 11.60 | 107.31 | 10.41 |
| <b>Penicillins (3)</b>                  |        |        |       |        |       |        |       |        |       |        |       |        |       |
| Cloxacillin                             | 27.70  | 99.00  | 7.40  | 95.51  | 17.89 | 100.40 | 7.83  | 102.51 | 4.84  | 100.58 | 7.12  | 97.75  | 3.83  |
| Nafcillin                               | 10.94  | 96.11  | 14.82 | 111.40 | 4.14  | 83.55  | 2.26  | 101.73 | 7.81  | 109.03 | 3.08  | 89.37  | 9.20  |
| Penicillin V                            | -24.91 | 106.33 | 16.71 | 104.22 | 3.64  | 113.35 | 6.59  | 108.81 | 3.22  | 102.67 | 2.14  | 100.68 | 17.80 |
| <b>Phenylhydrazines (1)</b>             |        |        |       |        |       |        |       |        |       |        |       |        |       |
| Diminazene                              | 31.12  | 112.26 | 5.47  | 78.25  | 14.45 | 82.91  | 11.15 | 95.03  | 25.65 | 77.70  | 1.00  | 78.65  | 7.66  |
| <b>Polypeptides (1)</b>                 |        |        |       |        |       |        |       |        |       |        |       |        |       |
| Bacitracin                              | -94.02 | 95.05  | 12.43 | 108.50 | 3.84  | 107.82 | 9.20  | 94.77  | 0.42  | 100.38 | 11.44 | 102.78 | 6.94  |
| <b>Pyrethrins (1)</b>                   |        |        |       |        |       |        |       |        |       |        |       |        |       |
| Tetramethrin                            | -6.55  | 105.44 | 16.78 | 101.58 | 6.22  | 99.89  | 4.06  | 105.72 | 0.37  | 106.25 | 6.22  | 104.51 | 6.25  |
| <b>Quinolones (5)</b>                   |        |        |       |        |       |        |       |        |       |        |       |        |       |
| Danofloxacin                            | 57.31  | 105.50 | 8.58  | 101.50 | 9.53  | 98.55  | 4.58  | 95.25  | 15.23 | 91.01  | 16.30 | 86.38  | 19.93 |
| Marbofloxacin                           | 39.63  | 105.82 | 9.74  | 102.27 | 4.55  | 108.89 | 11.80 | 94.16  | 17.52 | 91.48  | 16.68 | 93.76  | 22.83 |
| Ofloxacin                               | 43.98  | 73.70  | 15.04 | 106.09 | 3.21  | 104.78 | 8.47  | 78.88  | 9.29  | 95.91  | 15.01 | 93.21  | 17.55 |
| Orbifloxacin                            | -99.21 | 105.47 | 13.65 | 108.29 | 3.38  | 110.31 | 6.43  | 103.77 | 2.32  | 104.87 | 4.61  | 105.09 | 7.02  |
| Sarafloxacin                            | -23.92 | 89.66  | 8.10  | 78.14  | 9.15  | 82.76  | 7.30  | 83.78  | 9.93  | 76.43  | 3.17  | 76.69  | 11.19 |
| <b>Sulfonamides (3)</b>                 |        |        |       |        |       |        |       |        |       |        |       |        |       |
| Phthalylsulfathiazole                   | -34.16 | 96.98  | 6.76  | 84.88  | 6.56  | 109.06 | 5.57  | 93.16  | 5.80  | 85.88  | 1.64  | 98.14  | 15.74 |
| Succinylsulfathiazole                   | -11.39 | 115.84 | 6.14  | 93.33  | 8.31  | 91.71  | 9.90  | 110.04 | 7.45  | 94.50  | 1.74  | 96.05  | 6.39  |
| Sulfisoxazole                           | 35.43  | 106.93 | 7.89  | 112.44 | 7.23  | 108.70 | 8.12  | 109.16 | 2.89  | 110.79 | 2.11  | 108.51 | 0.25  |
| <b>Tetracycline (3)</b>                 |        |        |       |        |       |        |       |        |       |        |       |        |       |
| Doxycycline                             | -40.28 | 115.40 | 7.12  | 88.76  | 16.58 | 95.54  | 10.91 | 102.98 | 17.06 | 85.14  | 6.02  | 85.38  | 16.84 |
| Minocycline                             | -15.39 | 102.86 | 9.07  | 115.85 | 2.85  | 109.30 | 3.57  | 95.53  | 10.85 | 98.81  | 24.40 | 93.68  | 23.58 |
| Oxytetracycline                         | -35.59 | 105.64 | 12.52 | 104.87 | 14.64 | 93.63  | 6.27  | 93.20  | 18.88 | 90.19  | 23.03 | 83.38  | 17.39 |
| <b>Neuroleptic agents (1)</b>           |        |        |       |        |       |        |       |        |       |        |       |        |       |
| Phenothiazine                           | -43.13 | 91.72  | 8.86  | 81.83  | 13.77 | 104.09 | 4.29  | 99.67  | 11.27 | 94.93  | 19.51 | 106.40 | 3.06  |
| <b>Triazene trypanocidal agents (1)</b> |        |        |       |        |       |        |       |        |       |        |       |        |       |
| Isometamidium                           | 11.53  | 89.73  | 8.59  | 107.28 | 4.15  | 100.89 | 10.85 | 82.33  | 12.72 | 90.42  | 26.38 | 86.61  | 23.32 |
| <b>Other (1)</b>                        |        |        |       |        |       |        |       |        |       |        |       |        |       |
| Monoacetyl dapsone                      | -46.75 | 102.09 | 17.32 | 114.43 | 6.57  | 115.71 | 4.75  | 105.81 | 4.97  | 112.58 | 2.33  | 111.74 | 5.02  |

| Cow feed                    |        |        |       |        |       |        |       |        |       |        |       |        |       |
|-----------------------------|--------|--------|-------|--------|-------|--------|-------|--------|-------|--------|-------|--------|-------|
| <b>Amphenicols (1)</b>      |        |        |       |        |       |        |       |        |       |        |       |        |       |
| Florfenicol amine           | 99.13  | 107.63 | 7.16  | 89.33  | 13.16 | 79.55  | 3.58  | 105.45 | 2.92  | 98.29  | 12.89 | 93.50  | 21.10 |
| <b>Anthelmintics (1)</b>    |        |        |       |        |       |        |       |        |       |        |       |        |       |
| Diethylcarbamazine          | 8.89   | 110.53 | 15.37 | 105.01 | 9.24  | 93.56  | 12.83 | 106.83 | 4.90  | 104.88 | 0.18  | 99.27  | 8.13  |
| <b>Cephalosporins (4)</b>   |        |        |       |        |       |        |       |        |       |        |       |        |       |
| Cefadroxil                  | -93.87 | 91.01  | 16.37 | 86.40  | 2.79  | 81.41  | 6.97  | 90.49  | 0.82  | 86.63  | 0.38  | 86.42  | 8.20  |
| Cefalexin                   | -94.81 | 101.63 | 14.92 | 82.56  | 11.54 | 95.94  | 7.98  | 95.95  | 8.38  | 85.61  | 5.03  | 94.69  | 1.87  |
| Cefalonium                  | -95.10 | 90.74  | 13.01 | 79.46  | 9.16  | 72.45  | 5.36  | 86.24  | 7.39  | 84.92  | 9.09  | 79.40  | 12.38 |
| Cephapirin                  | -48.97 | 107.80 | 3.69  | 97.26  | 11.43 | 108.29 | 9.09  | 92.54  | 23.33 | 88.48  | 14.04 | 95.35  | 19.19 |
| <b>Coccidiostats (1)</b>    |        |        |       |        |       |        |       |        |       |        |       |        |       |
| Amprolium                   | 0.49   | 102.89 | 7.92  | 86.16  | 7.89  | 98.65  | 9.31  | 99.73  | 4.48  | 94.82  | 12.92 | 102.18 | 4.89  |
| <b>Lincosamides (1)</b>     |        |        |       |        |       |        |       |        |       |        |       |        |       |
| Lincomycin                  | 4.58   | 96.56  | 12.33 | 95.85  | 6.12  | 90.80  | 13.59 | 103.16 | 9.04  | 101.35 | 7.67  | 97.10  | 9.17  |
| <b>Macrolide (1)</b>        |        |        |       |        |       |        |       |        |       |        |       |        |       |
| Tulathromycin               | -46.79 | 111.18 | 1.97  | 97.58  | 4.45  | 101.51 | 11.18 | 105.04 | 8.27  | 99.73  | 3.05  | 103.50 | 2.71  |
| <b>Nitroimidazole (1)</b>   |        |        |       |        |       |        |       |        |       |        |       |        |       |
| Metronidazole-OH            | -48.37 | 86.28  | 11.16 | 101.28 | 10.18 | 94.54  | 11.66 | 96.59  | 15.09 | 104.47 | 4.31  | 99.35  | 6.85  |
| <b>Penicillins (3)</b>      |        |        |       |        |       |        |       |        |       |        |       |        |       |
| Cloxacillin                 | -30.52 | 104.66 | 0.47  | 91.72  | 3.08  | 104.09 | 4.29  | 101.31 | 4.68  | 97.04  | 7.75  | 102.31 | 2.47  |
| Nafcillin                   | -60.13 | 102.82 | 15.28 | 108.64 | 15.19 | 91.46  | 12.66 | 106.79 | 5.26  | 109.50 | 1.10  | 98.65  | 10.31 |
| Penicillin V                | -54.14 | 85.88  | 14.44 | 94.19  | 11.42 | 95.56  | 15.40 | 94.15  | 12.42 | 96.41  | 3.25  | 99.81  | 6.02  |
| <b>Phenylhydrazines (1)</b> |        |        |       |        |       |        |       |        |       |        |       |        |       |
| Diminazene                  | 1.32   | 107.80 | 3.69  | 82.57  | 13.84 | 92.47  | 14.95 | 92.41  | 23.56 | 80.33  | 3.94  | 83.28  | 15.62 |
| <b>Polypeptides (1)</b>     |        |        |       |        |       |        |       |        |       |        |       |        |       |
| Bacitracin                  | -94.59 | 95.79  | 12.99 | 80.19  | 7.27  | 104.76 | 8.89  | 84.63  | 18.65 | 80.09  | 0.19  | 94.32  | 15.66 |
| <b>Pyrethrins (1)</b>       |        |        |       |        |       |        |       |        |       |        |       |        |       |
| Tetramethrin                | -2.49  | 99.76  | 0.83  | 98.30  | 3.72  | 94.85  | 15.31 | 97.30  | 3.58  | 97.93  | 0.54  | 97.05  | 3.21  |
| <b>Quinolones (5)</b>       |        |        |       |        |       |        |       |        |       |        |       |        |       |
| Danofloxacin                | 5.82   | 101.14 | 8.91  | 86.91  | 11.90 | 79.72  | 5.04  | 86.38  | 24.17 | 81.14  | 10.06 | 74.97  | 8.97  |
| Marbofloxacin               | 2.92   | 95.87  | 7.72  | 94.78  | 9.73  | 76.52  | 1.94  | 86.28  | 15.72 | 85.40  | 15.54 | 73.41  | 6.00  |
| Ofloxacin                   | 9.43   | 86.97  | 7.94  | 91.46  | 12.56 | 72.39  | 4.22  | 79.13  | 14.02 | 85.18  | 10.44 | 72.91  | 1.01  |

|                                  |        |        |       |        |       |        |       |        |       |        |       |        |       |
|----------------------------------|--------|--------|-------|--------|-------|--------|-------|--------|-------|--------|-------|--------|-------|
| Orbifloxacin                     | 3.83   | 90.99  | 11.65 | 93.03  | 12.99 | 85.90  | 10.02 | 86.62  | 7.13  | 90.86  | 3.39  | 92.86  | 10.59 |
| Sarafloxacin                     | -49.99 | 98.07  | 13.56 | 79.88  | 8.90  | 88.50  | 14.37 | 88.92  | 14.56 | 76.56  | 6.14  | 81.30  | 12.52 |
| Sulfonamides (3)                 |        |        |       |        |       |        |       |        |       |        |       |        |       |
| Phthalylsulfathiazole            | -46.59 | 84.18  | 6.59  | 93.53  | 5.65  | 91.87  | 7.47  | 81.15  | 5.28  | 87.10  | 10.44 | 89.78  | 3.29  |
| Succinylsulfathiazole            | -48.55 | 95.70  | 4.90  | 95.57  | 11.96 | 98.28  | 12.19 | 93.81  | 2.85  | 95.11  | 0.69  | 97.94  | 0.50  |
| Sulfisoxazole                    | 3.69   | 103.06 | 4.91  | 98.06  | 5.73  | 95.30  | 15.44 | 104.44 | 1.87  | 100.90 | 3.98  | 102.12 | 9.44  |
| Tetracycline (3)                 |        |        |       |        |       |        |       |        |       |        |       |        |       |
| Doxycycline                      | -60.66 | 98.59  | 0.93  | 98.71  | 9.63  | 91.39  | 15.80 | 88.06  | 16.91 | 88.77  | 15.84 | 82.14  | 15.93 |
| Minocycline                      | -65.71 | 103.58 | 8.36  | 100.85 | 8.51  | 88.32  | 10.15 | 90.47  | 20.49 | 87.34  | 21.88 | 80.91  | 12.96 |
| Oxytetracycline                  | -55.38 | 92.68  | 5.29  | 87.51  | 2.06  | 97.19  | 15.86 | 83.94  | 14.73 | 82.34  | 8.88  | 88.53  | 13.83 |
| Neuroleptic agents (1)           |        |        |       |        |       |        |       |        |       |        |       |        |       |
| Phenothiazine                    | -44.24 | 87.87  | 7.23  | 89.79  | 6.79  | 79.40  | 6.82  | 94.87  | 10.43 | 98.87  | 12.99 | 93.32  | 21.09 |
| Triazene trypanocidal agents (1) |        |        |       |        |       |        |       |        |       |        |       |        |       |
| Isometamidium                    | -5.00  | 92.15  | 3.01  | 90.68  | 9.22  | 82.28  | 6.42  | 81.74  | 18.02 | 82.01  | 14.95 | 78.03  | 7.71  |
| Other (1)                        |        |        |       |        |       |        |       |        |       |        |       |        |       |
| Monoacetyl dapsone               | -52.87 | 105.60 | 4.62  | 98.94  | 10.82 | 94.28  | 12.75 | 102.92 | 3.68  | 101.03 | 2.92  | 98.01  | 5.38  |
| Pet feed                         |        |        |       |        |       |        |       |        |       |        |       |        |       |
| Amphenicols (1)                  |        |        |       |        |       |        |       |        |       |        |       |        |       |
| Florfenicol amine                | 76.18  | 104.78 | 3.89  | 110.20 | 2.75  | 90.51  | 10.67 | 95.39  | 13.92 | 101.46 | 12.18 | 94.76  | 6.34  |
| Anthelmintics (1)                |        |        |       |        |       |        |       |        |       |        |       |        |       |
| Diethylcarbamazine               | 91.49  | 103.07 | 14.31 | 96.43  | 14.21 | 95.54  | 13.82 | 91.38  | 18.10 | 96.70  | 0.39  | 95.35  | 0.28  |
| Cephalosporins (4)               |        |        |       |        |       |        |       |        |       |        |       |        |       |
| Cefadroxil                       | -87.47 | 94.54  | 3.23  | 80.39  | 7.84  | 76.75  | 4.79  | 84.28  | 17.23 | 78.44  | 3.52  | 75.87  | 1.65  |
| Cefalexin                        | -90.60 | 95.90  | 8.17  | 72.60  | 4.75  | 71.01  | 4.57  | 88.01  | 12.69 | 76.77  | 7.68  | 76.23  | 9.68  |
| Cefalonium                       | -94.30 | 100.47 | 9.47  | 98.01  | 10.97 | 70.79  | 1.80  | 86.49  | 22.87 | 85.85  | 20.03 | 70.50  | 0.58  |
| Cephapirin                       | -15.28 | 83.48  | 10.46 | 96.37  | 12.13 | 101.23 | 1.23  | 79.60  | 6.90  | 86.23  | 16.64 | 88.63  | 20.11 |
| Coccidiostats (1)                |        |        |       |        |       |        |       |        |       |        |       |        |       |
| Amprolium                        | -77.81 | 70.75  | 9.62  | 103.99 | 8.36  | 72.10  | 3.49  | 82.31  | 19.85 | 101.40 | 3.62  | 84.27  | 20.42 |
| Lincosamides (1)                 |        |        |       |        |       |        |       |        |       |        |       |        |       |
| Lincomycin                       | 82.95  | 97.24  | 10.59 | 93.48  | 4.83  | 89.22  | 17.69 | 97.70  | 0.66  | 96.23  | 4.03  | 93.79  | 6.89  |
| Macrolide (1)                    |        |        |       |        |       |        |       |        |       |        |       |        |       |

|                                         |        |        |       |        |       |        |       |        |       |        |       |        |       |
|-----------------------------------------|--------|--------|-------|--------|-------|--------|-------|--------|-------|--------|-------|--------|-------|
| Tulathromycin                           | -1.98  | 104.82 | 2.27  | 82.43  | 1.44  | 91.92  | 12.23 | 98.57  | 8.97  | 91.41  | 13.89 | 93.95  | 3.06  |
| <b>Nitroimidazole (1)</b>               |        |        |       |        |       |        |       |        |       |        |       |        |       |
| Metronidazole-OH                        | -0.15  | 103.84 | 13.07 | 87.10  | 7.42  | 86.34  | 14.68 | 96.64  | 10.54 | 90.09  | 4.69  | 89.92  | 5.63  |
| <b>Penicillins (3)</b>                  |        |        |       |        |       |        |       |        |       |        |       |        |       |
| Cloxacillin                             | 89.12  | 99.94  | 9.75  | 90.84  | 14.45 | 79.12  | 2.83  | 101.01 | 1.50  | 94.54  | 5.53  | 85.16  | 10.02 |
| Nafcillin                               | 49.81  | 107.64 | 8.41  | 84.84  | 11.39 | 100.17 | 6.71  | 107.65 | 0.01  | 94.62  | 14.61 | 97.12  | 4.45  |
| Penicillin V                            | 4.29   | 101.91 | 10.58 | 89.50  | 13.76 | 107.93 | 4.82  | 103.49 | 2.15  | 96.79  | 10.64 | 102.18 | 7.96  |
| <b>Phenylhydrazines (1)</b>             |        |        |       |        |       |        |       |        |       |        |       |        |       |
| Diminazene                              | 82.58  | 99.14  | 4.51  | 78.71  | 5.42  | 93.51  | 8.12  | 94.55  | 6.87  | 81.22  | 4.36  | 83.39  | 17.17 |
| <b>Polypeptides (1)</b>                 |        |        |       |        |       |        |       |        |       |        |       |        |       |
| Bacitracin                              | -92.38 | 92.60  | 6.07  | 85.18  | 7.38  | 101.14 | 10.01 | 85.73  | 11.34 | 80.51  | 8.20  | 89.75  | 17.96 |
| <b>Pyrethrins (1)</b>                   |        |        |       |        |       |        |       |        |       |        |       |        |       |
| Tetramethrin                            | 64.13  | 98.13  | 1.46  | 90.03  | 12.45 | 93.62  | 16.70 | 86.13  | 19.71 | 85.53  | 7.45  | 86.04  | 12.47 |
| <b>Quinolones (5)</b>                   |        |        |       |        |       |        |       |        |       |        |       |        |       |
| Danofloxacin                            | 6.24   | 90.84  | 14.61 | 106.11 | 3.11  | 77.82  | 6.38  | 85.58  | 8.69  | 93.56  | 18.97 | 78.45  | 1.14  |
| Marbofloxacin                           | 99.89  | 100.38 | 0.71  | 90.26  | 11.77 | 76.81  | 5.20  | 89.22  | 17.70 | 86.03  | 6.95  | 78.19  | 2.50  |
| Ofloxacin                               | -98.89 | 108.54 | 9.11  | 87.27  | 8.48  | 74.45  | 3.01  | 96.20  | 18.14 | 85.78  | 2.46  | 78.93  | 8.02  |
| Orbifloxacin                            | -98.95 | 94.79  | 9.02  | 79.18  | 3.35  | 76.77  | 3.06  | 92.50  | 3.51  | 86.87  | 12.51 | 84.66  | 13.18 |
| Sarafloxacin                            | 3.66   | 86.38  | 13.64 | 77.59  | 3.08  | 104.76 | 10.48 | 80.78  | 9.81  | 77.06  | 0.97  | 89.76  | 23.64 |
| <b>Sulfonamides (3)</b>                 |        |        |       |        |       |        |       |        |       |        |       |        |       |
| Phthalylsulfathiazole                   | -14.12 | 90.35  | 13.08 | 76.89  | 4.93  | 97.45  | 2.39  | 82.30  | 13.83 | 76.23  | 1.22  | 84.20  | 22.26 |
| Succinylsulfathiazole                   | 14.18  | 108.21 | 5.29  | 88.74  | 12.71 | 104.57 | 8.67  | 97.13  | 16.14 | 88.06  | 1.10  | 92.84  | 17.88 |
| Sulfisoxazole                           | 91.43  | 103.06 | 3.81  | 81.74  | 6.25  | 77.56  | 9.81  | 98.66  | 6.31  | 89.08  | 11.65 | 86.51  | 14.63 |
| <b>Tetracycline (3)</b>                 |        |        |       |        |       |        |       |        |       |        |       |        |       |
| Doxycycline                             | -30.68 | 89.64  | 1.77  | 79.69  | 1.61  | 89.14  | 17.30 | 84.87  | 7.96  | 81.51  | 3.16  | 85.12  | 6.68  |
| Minocycline                             | 7.45   | 105.79 | 2.99  | 84.01  | 2.50  | 83.37  | 14.36 | 93.51  | 18.57 | 80.74  | 5.74  | 81.40  | 3.42  |
| Oxytetracycline                         | -38.31 | 98.85  | 10.01 | 89.12  | 8.27  | 90.60  | 13.29 | 99.84  | 1.40  | 86.16  | 4.87  | 85.90  | 7.74  |
| <b>Neuroleptic agents (1)</b>           |        |        |       |        |       |        |       |        |       |        |       |        |       |
| Phenothiazine                           | -1.08  | 96.83  | 13.82 | 95.24  | 7.03  | 85.42  | 13.32 | 101.24 | 6.16  | 101.04 | 8.12  | 94.95  | 14.19 |
| <b>Triazene trypanocidal agents (1)</b> |        |        |       |        |       |        |       |        |       |        |       |        |       |
| Isometamidium                           | 39.41  | 94.23  | 8.14  | 102.49 | 6.58  | 86.69  | 12.15 | 85.80  | 13.90 | 90.24  | 19.21 | 81.00  | 9.93  |

**Other (1)**

|                    |        |        |      |       |       |       |      |        |       |       |       |       |      |
|--------------------|--------|--------|------|-------|-------|-------|------|--------|-------|-------|-------|-------|------|
| Monoacetyl dapsone | -22.04 | 111.50 | 4.06 | 79.01 | 11.73 | 98.11 | 7.16 | 103.42 | 11.05 | 88.30 | 14.87 | 96.61 | 2.20 |
|--------------------|--------|--------|------|-------|-------|-------|------|--------|-------|-------|-------|-------|------|

---

**Table S2.** Accuracy and precision according to the difference in extraction conditions in the sample preparation optimization process ( $n=3$ ).

| Compound              | Extraction conditions       |            |                             |            |                            |            |
|-----------------------|-----------------------------|------------|-----------------------------|------------|----------------------------|------------|
|                       | 1% Formic acid in 100% MeOH |            | 1% Acetic acid in 100% MeOH |            | 1% Acetic acid in 70% MeOH |            |
|                       | Recovery<br>(%)             | RSD<br>(%) | Recovery<br>(%)             | RSD<br>(%) | Recovery<br>(%)            | RSD<br>(%) |
| Amprolium             | 99.40                       | 4.02       | 89.87                       | 2.96       | 94.93                      | 1.72       |
| Bacitracin            | 54.53                       | 8.71       | 75.20                       | 5.87       | 23.05                      | 4.60       |
| Cefadroxil            | 105.13                      | 6.17       | 108.20                      | 4.62       | 102.00                     | 4.08       |
| Cefalexin             | 111.03                      | 1.24       | 103.93                      | 6.03       | 161.27                     | 4.94       |
| Cefalonium            | 77.87                       | 0.78       | 74.60                       | 5.62       | 62.00                      | 4.28       |
| Cephapirin            | 88.73                       | 4.18       | 76.80                       | 2.34       | 93.47                      | 0.54       |
| Cloxacillin           | 95.17                       | 17.34      | 92.60                       | 15.24      | 115.37                     | 3.11       |
| Danofloxacin          | 101.00                      | 8.06       | 93.67                       | 9.69       | 91.67                      | 3.01       |
| Diethylcarbamazine    | 110.40                      | 3.33       | 89.87                       | 1.71       | 101.20                     | 2.08       |
| Diminazene            | 110.73                      | 7.81       | 75.20                       | 8.06       | 116.33                     | 3.10       |
| Doxycycline           | 91.13                       | 13.30      | 108.20                      | 5.70       | 94.40                      | 10.02      |
| Florfenicol amine     | 91.87                       | 2.69       | 103.93                      | 1.35       | 75.00                      | 3.59       |
| Isometamidium         | 94.33                       | 5.09       | 74.60                       | 3.24       | 100.20                     | 15.84      |
| Lincomycin            | 110.87                      | 6.05       | 76.80                       | 1.72       | 102.20                     | 1.48       |
| Marbofloxacin         | 98.33                       | 3.76       | 92.60                       | 3.50       | 94.87                      | 1.96       |
| Metronidazole_OH      | 88.13                       | 5.41       | 93.67                       | 4.37       | 82.47                      | 2.83       |
| Minocycline           | 24.63                       | 9.98       | 95.60                       | 0.89       | 22.60                      | 13.82      |
| Monoacetyl dapsone    | 106.67                      | 6.00       | 104.33                      | 4.83       | 109.93                     | 6.55       |
| Nafcillin             | 94.07                       | 6.31       | 82.80                       | 6.08       | 127.07                     | 4.81       |
| Ofloxacin             | 97.00                       | 9.32       | 81.67                       | 5.41       | 98.47                      | 2.77       |
| Orbifloxacin          | 105.13                      | 6.25       | 99.20                       | 4.60       | 101.93                     | 7.09       |
| Oxytetracycline       | 90.93                       | 12.13      | 99.20                       | 5.87       | 77.40                      | 5.16       |
| Penicillin V          | 82.27                       | 11.57      | 86.40                       | 6.97       | 94.93                      | 13.20      |
| Phenothiazine         | 105.93                      | 8.35       | 84.00                       | 4.78       | 23.05                      | 0.54       |
| Phthalylsulfathiazole | 107.53                      | 8.59       | 77.42                       | 3.88       | 102.00                     | 7.70       |
| Sarafloxacin          | 95.00                       | 14.27      | 102.27                      | 6.45       | 161.27                     | 2.99       |

| Extraction conditions |                             |      |                             |      |                            |      |
|-----------------------|-----------------------------|------|-----------------------------|------|----------------------------|------|
| Compound              | 1% Formic acid in 100% MeOH |      | 1% Acetic acid in 100% MeOH |      | 1% Acetic acid in 70% MeOH |      |
|                       | Recovery                    | RSD  | Recovery                    | RSD  | Recovery                   | RSD  |
|                       | (%)                         | (%)  | (%)                         | (%)  | (%)                        | (%)  |
| Succinylsulfathiazole | 101.87                      | 6.35 | 95.07                       | 4.74 | 62.00                      | 6.36 |
| Sulfisoxazole         | 107.20                      | 7.55 | 89.27                       | 5.67 | 93.47                      | 5.88 |
| Tetramethrin          | 106.20                      | 7.90 | 100.20                      | 1.33 | 115.37                     | 2.54 |
| Tulathromycin         | 116.43                      | 1.74 | 77.20                       | 4.37 | 91.67                      | 7.32 |
